# Supplementary material for: Coral calcifying fluid aragonite saturation states derived from Raman spectroscopy
Source: Copernicus journal article supplement (doi:10.5194/bg-14-5253-2017), 2017-11-24
Supplement: Supplementary file [file bg-14-5253-2017-supplement-title-page.pdf › bg-14-5253-2017-supplement-title-page.pdf]

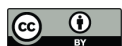

## *Supplement of*

# **Coral calcifying fluid aragonite saturation states derived from Raman spectroscopy**

**Thomas M. DeCarlo et al.**

*Correspondence to:* Thomas M. DeCarlo ([thomas.decarlo@uwa.edu.au](mailto:thomas.decarlo@uwa.edu.au))

- [bg-14-5253-2017-supplement-title-page.pdf](#)
- [Description\\_of\\_code\\_files.pdf](#)
- [Supplement\\_text\\_and\\_figures.pdf](#)
- [example\\_peak\\_fitting.R](#)
- [example\\_spectrum.csv](#)
- [ramanFit.R](#)

The copyright of individual parts of the supplement might differ from the CC BY 3.0 License.
